# Supplementary material for: Scalable-produced 3D elastic thermoelectric network for body heat harvesting
Source: PubMed Central journal article supplement (PMC10224941; doi:10.1038/s41467-023-38852-4), 2023-05-27
Supplement: 41467_2023_38852_MOESM1_ESM.pdf [file 41467_2023_38852_MOESM1_ESM.pdf]

# Supplementary Materials for

## Scalable-Produced 3D Elastic Thermoelectric Network for Body Heat Harvesting

Yijie Liu<sup>a, b, #</sup>, Xiaodong Wang<sup>c, #</sup>, Shuaihang Hou<sup>c</sup>, Zuoxu Wu<sup>b</sup>, Jian Wang<sup>b</sup>, Jun Mao<sup>c, d</sup>, Qian Zhang<sup>c, d, \*</sup>, Zhiguo Liu<sup>a, \*</sup>, Feng Cao<sup>b, \*</sup>

<sup>a</sup> School of Physics, Harbin Institute of Technology, Harbin 150001, P. R. China  
[liuzhiguo@hit.edu.cn](mailto:liuzhiguo@hit.edu.cn)

<sup>b</sup> School of Science, and Ministry of Industry and Information Technology Key Lab of Micro-Nano Optoelectronic Information System, Harbin Institute of Technology, Shenzhen 518055, P. R. China [caofeng@hit.edu.cn](mailto:caofeng@hit.edu.cn)

<sup>c</sup> School of Materials Science and Engineering, Institute of Materials Genome & Big Data, and Flexible Printed Electronics Technology Center, Harbin Institute of Technology, Shenzhen 518055, P. R. China [zhangqf@hit.edu.cn](mailto:zhangqf@hit.edu.cn)

<sup>d</sup> State Key Laboratory of Advanced Welding and Joining, Harbin Institute of Technology, Harbin 150001, P. R. China

# Equal contribution

### Inventory of Supplementary Information:

- Supplementary Figures S1-S19                      Page 2-20
- Supplementary Tables S1-S2                        Page 21
- Supplementary References 1-4                      Page 22

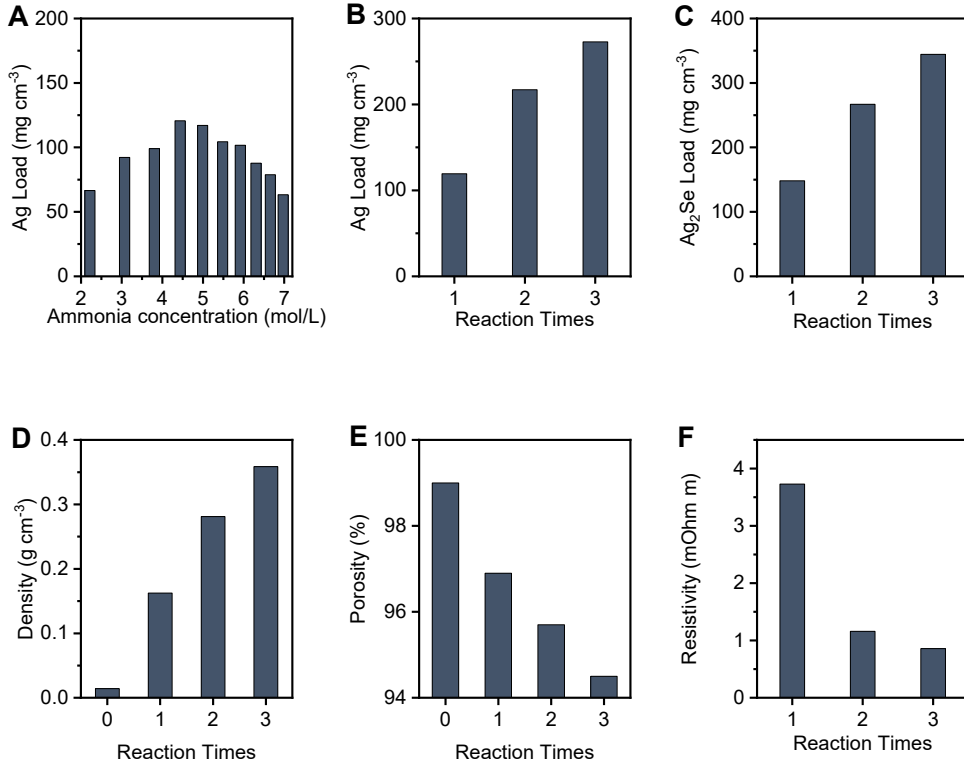

**Fig. S1.** **A**, The silver load with different ammonia concentration. The ammonia concentration with maximum loads was adopted for subsequent experiments. **B**, The silver load with different silvering times. **C**, The silver selenide load with different silvering times. **D**, The density of Ag<sub>2</sub>Se network with different silvering times. The number of 0 represents the pristine melamine template before reaction. **E**, Porosity of the Ag<sub>2</sub>Se networks were tested by the Archimedes method. **F**, Resistivity of the Ag<sub>2</sub>Se network with different loads.

The principle of the Archimedes method is given as follows:

The weights of the dry sample in air ( $m_1$ ), the sample fully filled with alcohol both in air ( $m_2$ ) and in alcohol ( $m_3$ ) were measured. Then the Ag<sub>2</sub>Se network's volume  $V_{\text{network}}$  (excluding pores) can be calculated using

$$V_{\text{network}} = \frac{m_1 - m_3}{\rho_{\text{alcohol}}} \quad (1)$$

where  $\rho_{\text{alcohol}}$  is the density of alcohol. The pores' volume  $V_{\text{pores}}$  (excluding network) can be calculated using

$$V_{\text{pores}} = \frac{m_2 - m_1}{\rho_{\text{alcohol}}} \quad (2)$$

So, the porosity of the Ag<sub>2</sub>Se network can be expressed as

$$\text{Porosity} = \frac{V_{\text{pores}}}{V_{\text{pores}} + V_{\text{network}}} = \frac{m_2 - m_1}{m_2 - m_3} \quad (3)$$

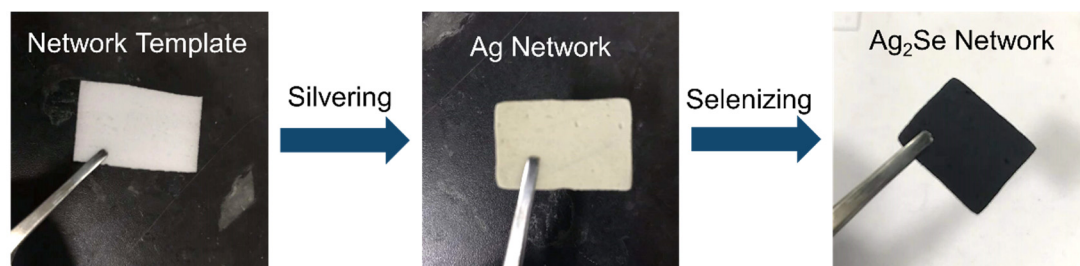

**Fig. S2.** The color changes in the reaction process.

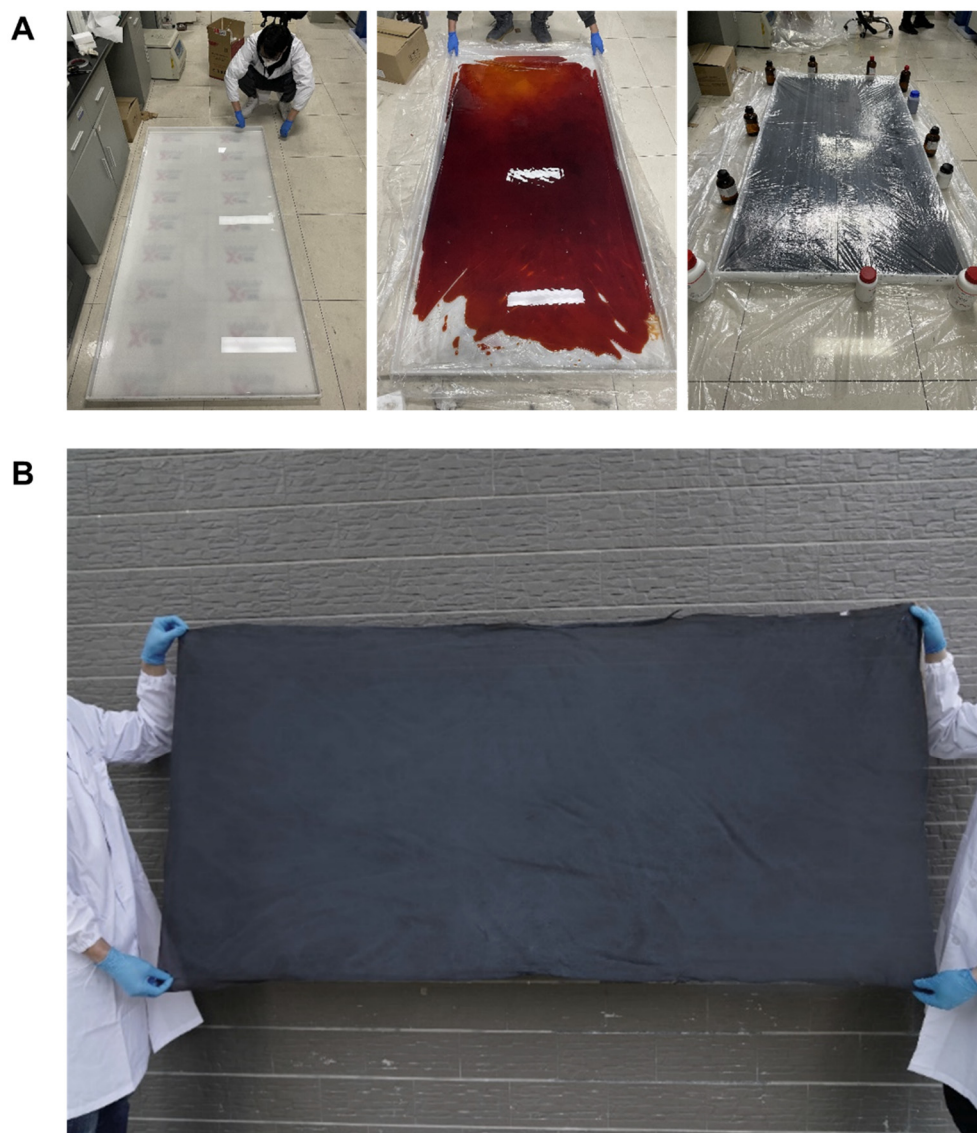

**Fig. S3.** **A**, The mass preparation process. **B**, The prepared large size  $\text{Ag}_2\text{Se}$  network.

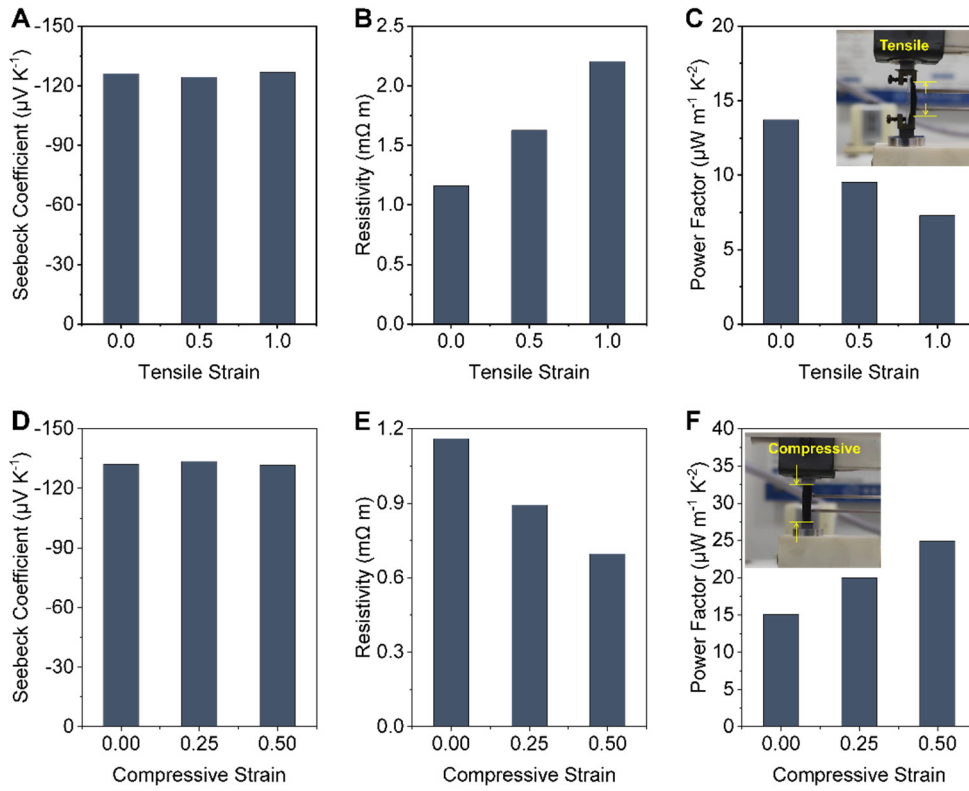

**Fig. S4.** The room-temperature Seebeck coefficient (A, D), resistivity (B, E) and power factor (C, F) of the Ag<sub>2</sub>Se network under different strains.

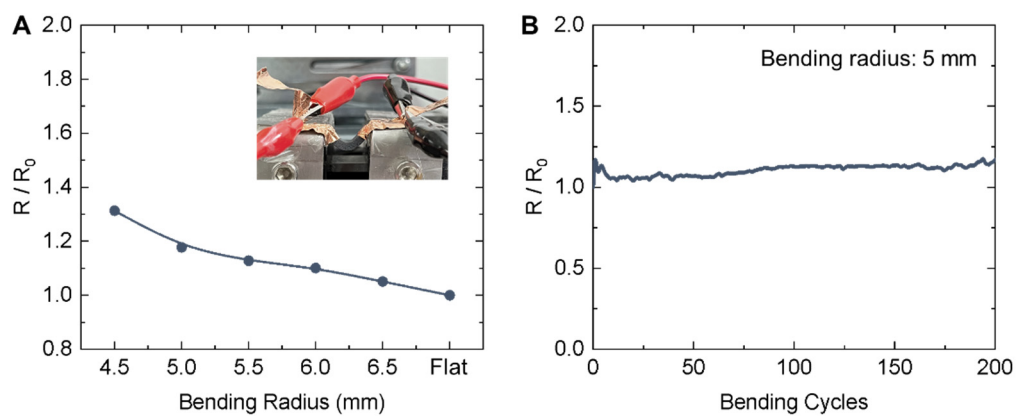

**Fig. S5.** **A**, Bending radius-dependent and **B**, bending cycles-dependent normalized resistance of the proposed  $\text{Ag}_2\text{Se}$  network.

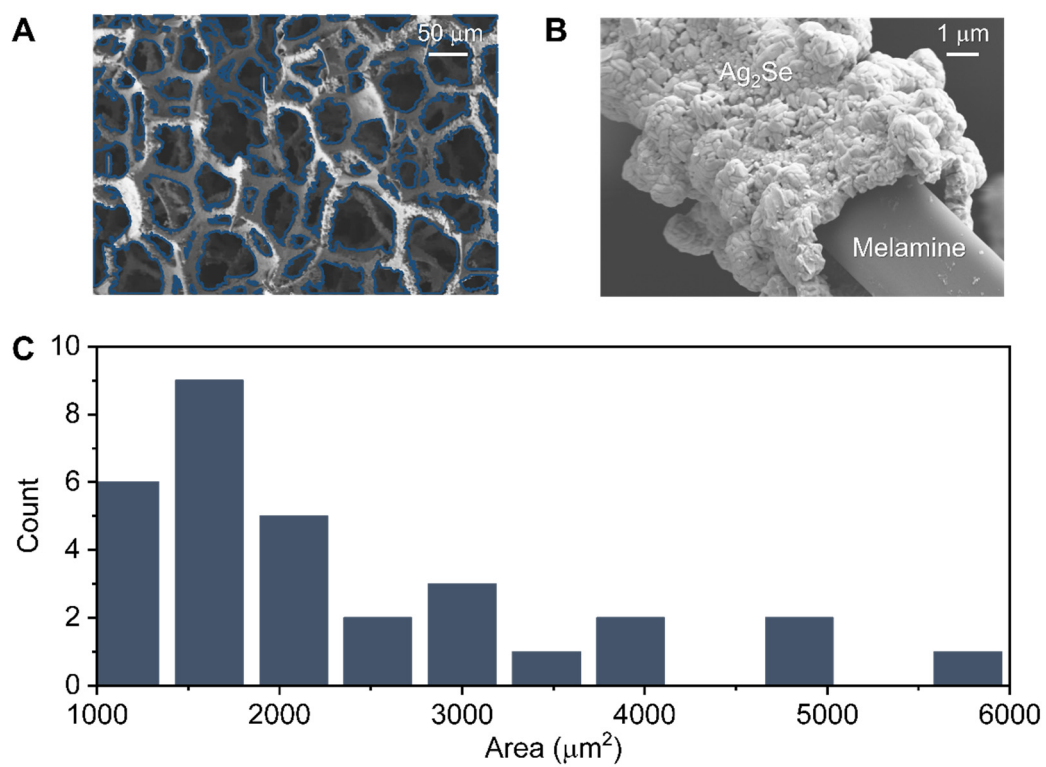

**Fig. S6.** **A**, The cross-section morphology of Ag<sub>2</sub>Se network. **B**, A detailed image of Ag<sub>2</sub>Se wrapping on a melamine fiber. **C**, Distribution of the pore size.

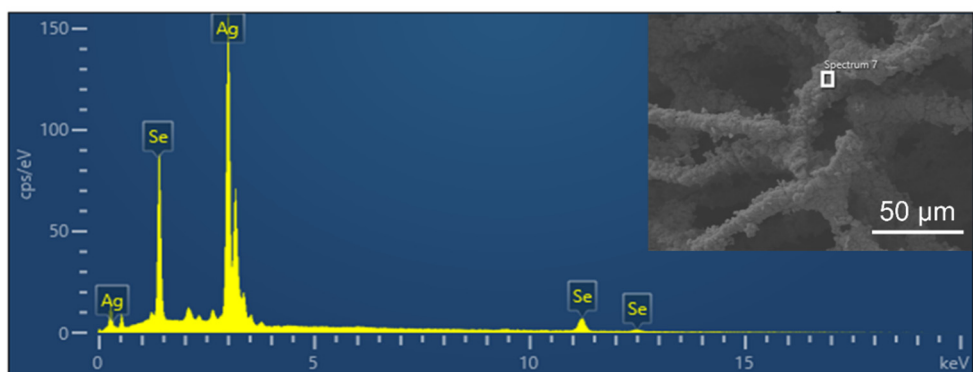

**Fig. S7.** Energy dispersive spectrum of Ag<sub>2</sub>Se network.



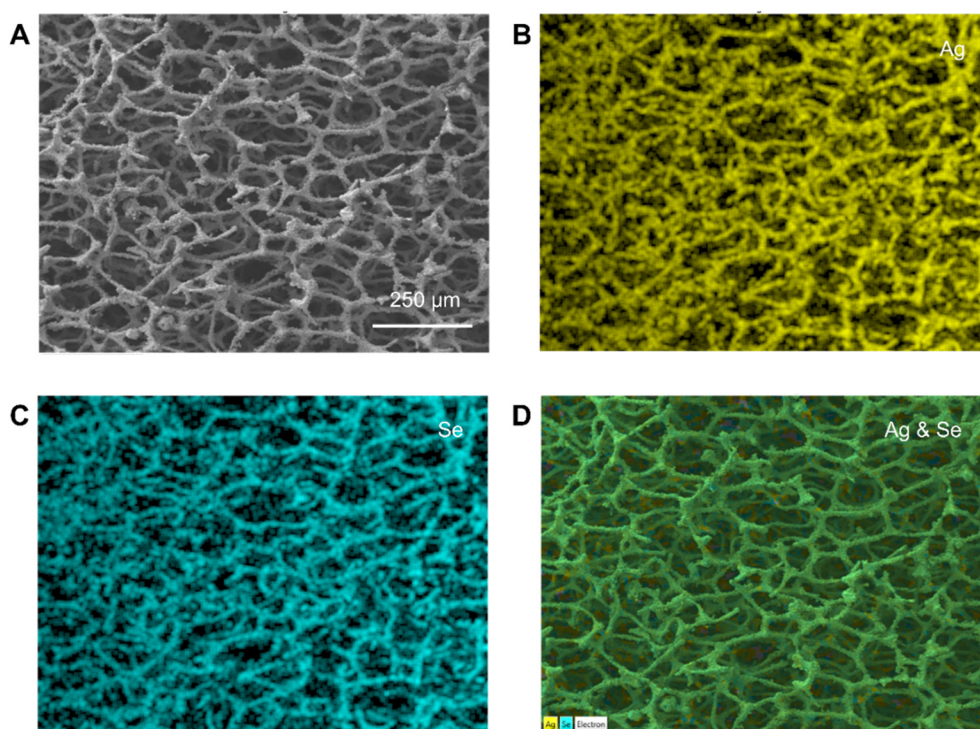

**Fig. S8.** The distribution of elements in  $\text{Ag}_2\text{Se}$  network.

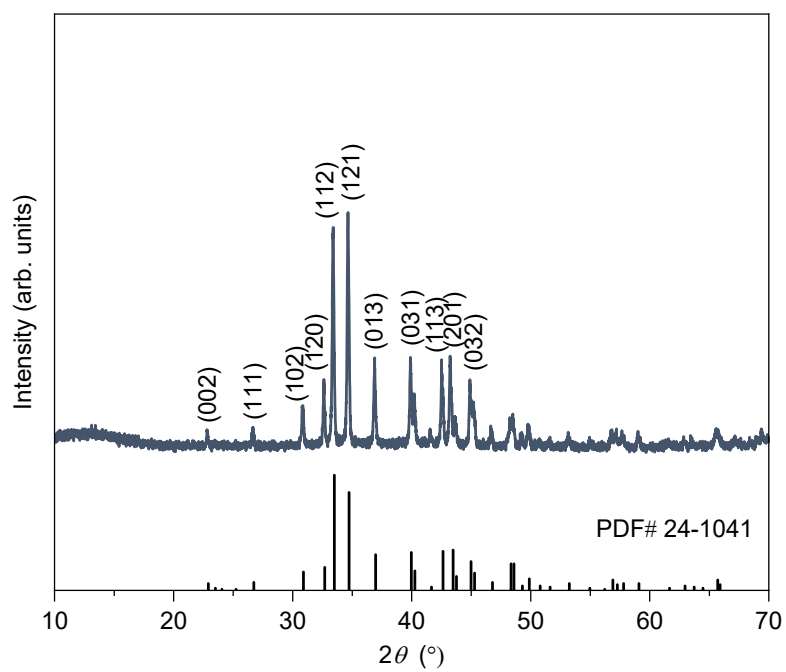

**Fig. S9.** XRD pattern of Ag<sub>2</sub>Se network. The obtained Ag<sub>2</sub>Se network is single phase without any impurities.

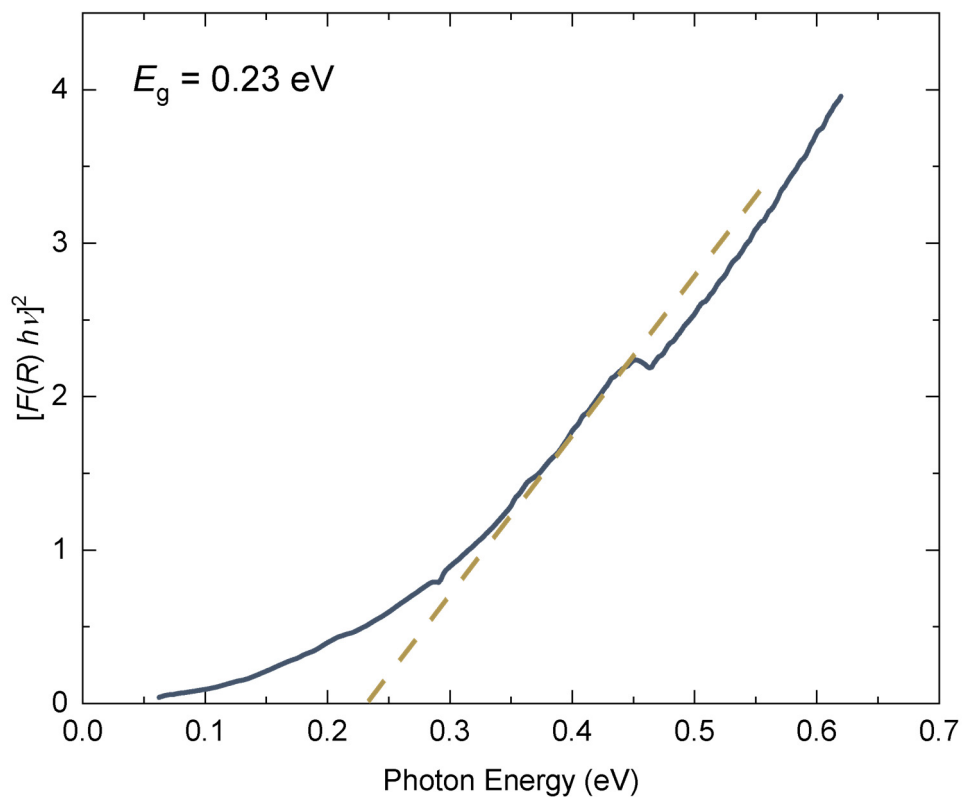

**Fig. S10.** Kubelka-Munk transformed reflectance spectra of Ag<sub>2</sub>Se network.

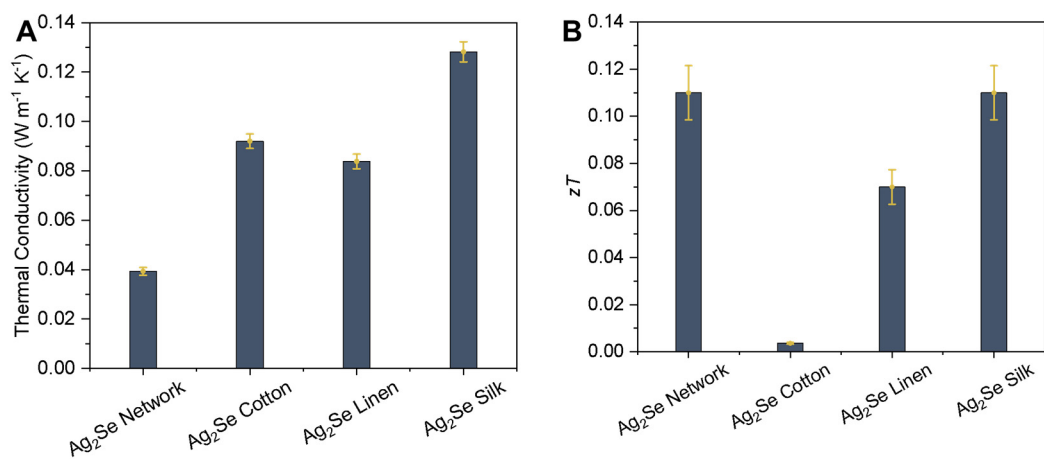

**Fig. S11. A**, Thermal conductivity and **B**, Room-temperature  $zT$  of the Ag<sub>2</sub>Se network and Ag<sub>2</sub>Se fabrics. Bars and error bars show the mean of the three readings and uncertainty of the results, respectively.

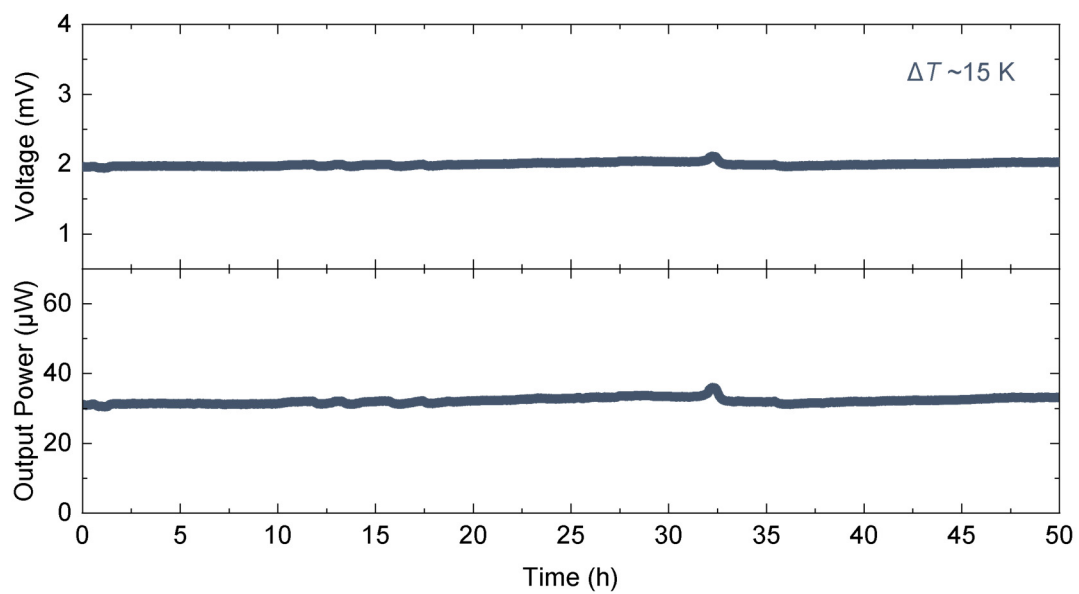

**Fig. S12.** The output performance changes with time at a fixed temperature difference of  $\sim 15$  K.

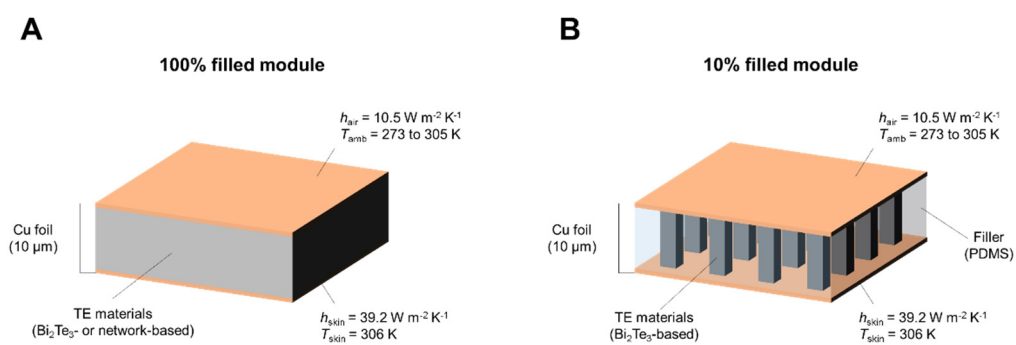

**Fig. S13.** Schematics of the simulation models. **A**, The  $\text{Bi}_2\text{Te}_3$ -based or  $\text{Ag}_2\text{Se}$  network based module with a fill factor of 100%. **B**, The  $\text{Bi}_2\text{Te}_3$ -based module with a fill factor of 10%. The specific material properties and the parameters' source were provided in Table S2.

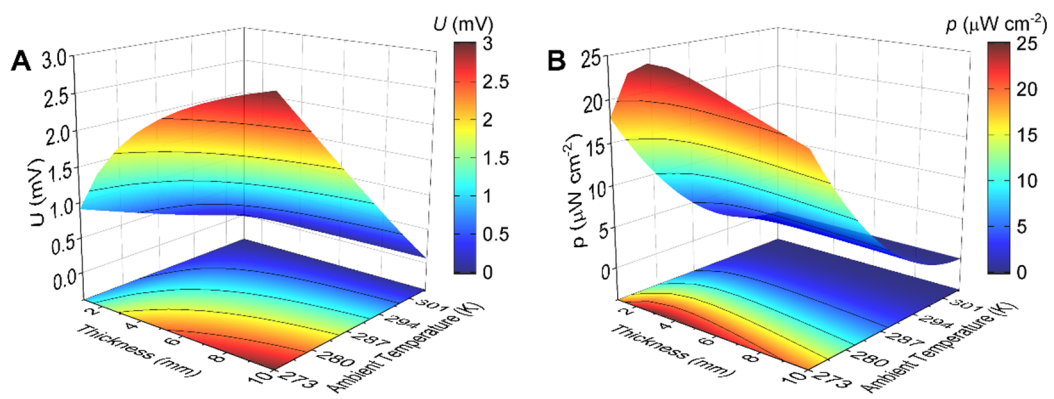

**Fig. S14.** **A**, Open-circuit voltage ( $U$ ) and **B**, power density ( $p$ ) of the network-based FTEG with different module thickness and ambient temperature.

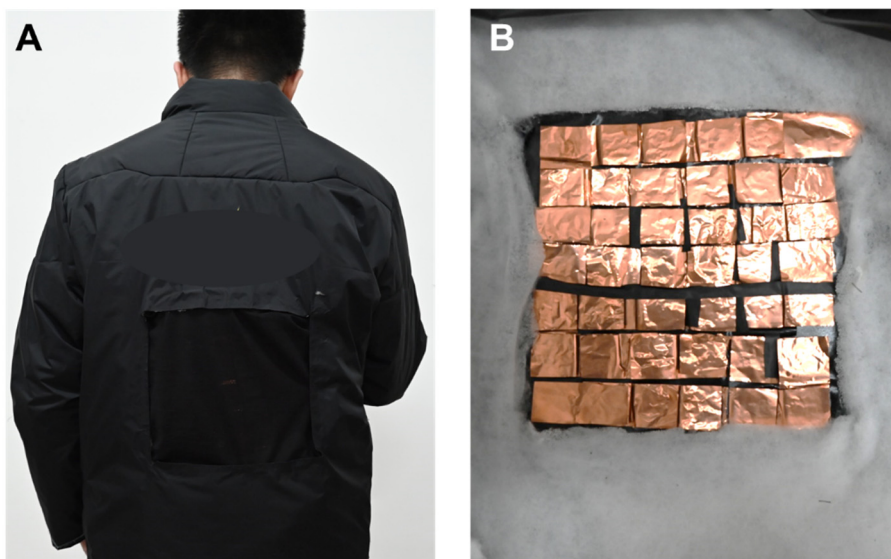

**Fig. S15.** **A**, Thermolectric jacket. **B**, The padded network-based FTEG.



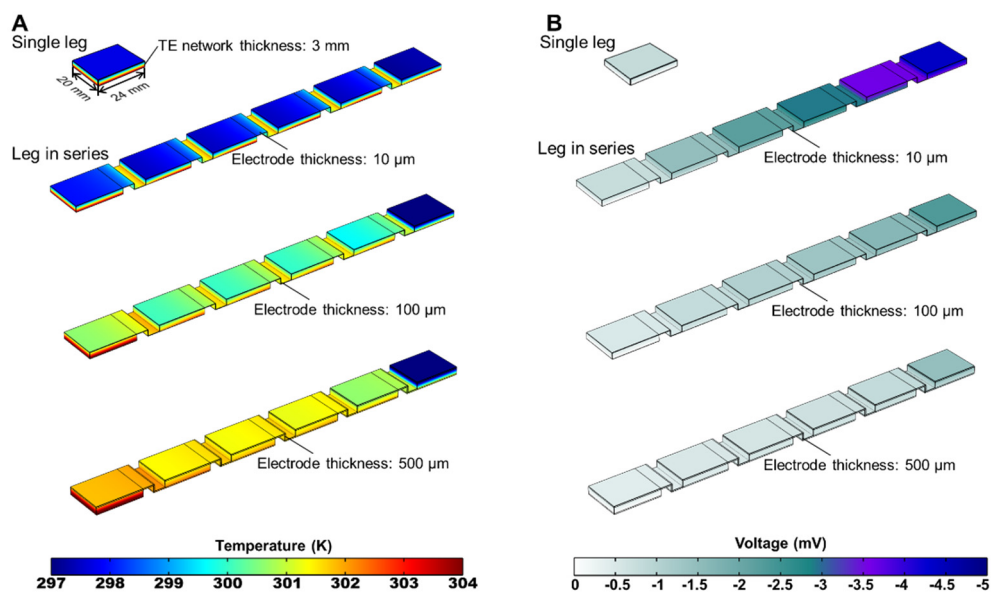

**Fig. S16.** Temperature distribution (**A**) and potential distribution (**B**) of the single leg and 6 legs in series. To further explain the effect of electrode thickness on temperature difference, we simulated the device with the same situation but thicker electrodes (eg., 100  $\mu\text{m}$  and 500  $\mu\text{m}$ ). The device with thicker electrodes is difficult to establish temperature and potential differences.

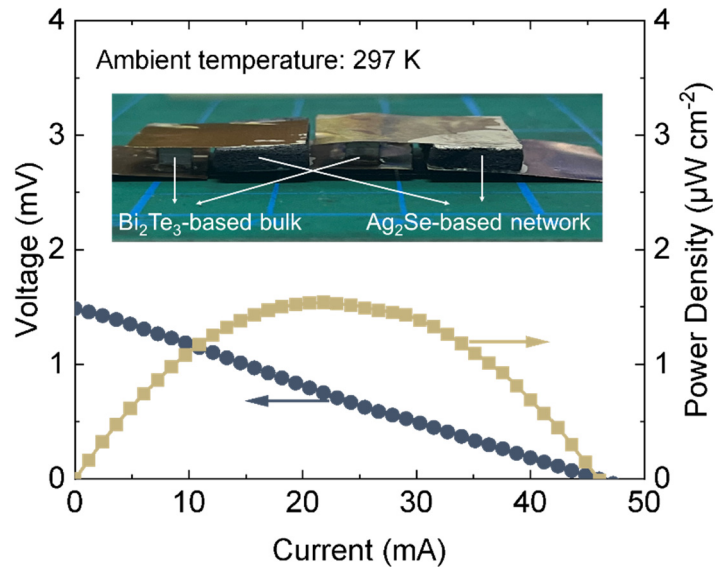

**Fig. S17.** Output performance of the FTEG with p-type Bi<sub>2</sub>Te<sub>3</sub>-based bulks and n-type Ag<sub>2</sub>Se-based networks.

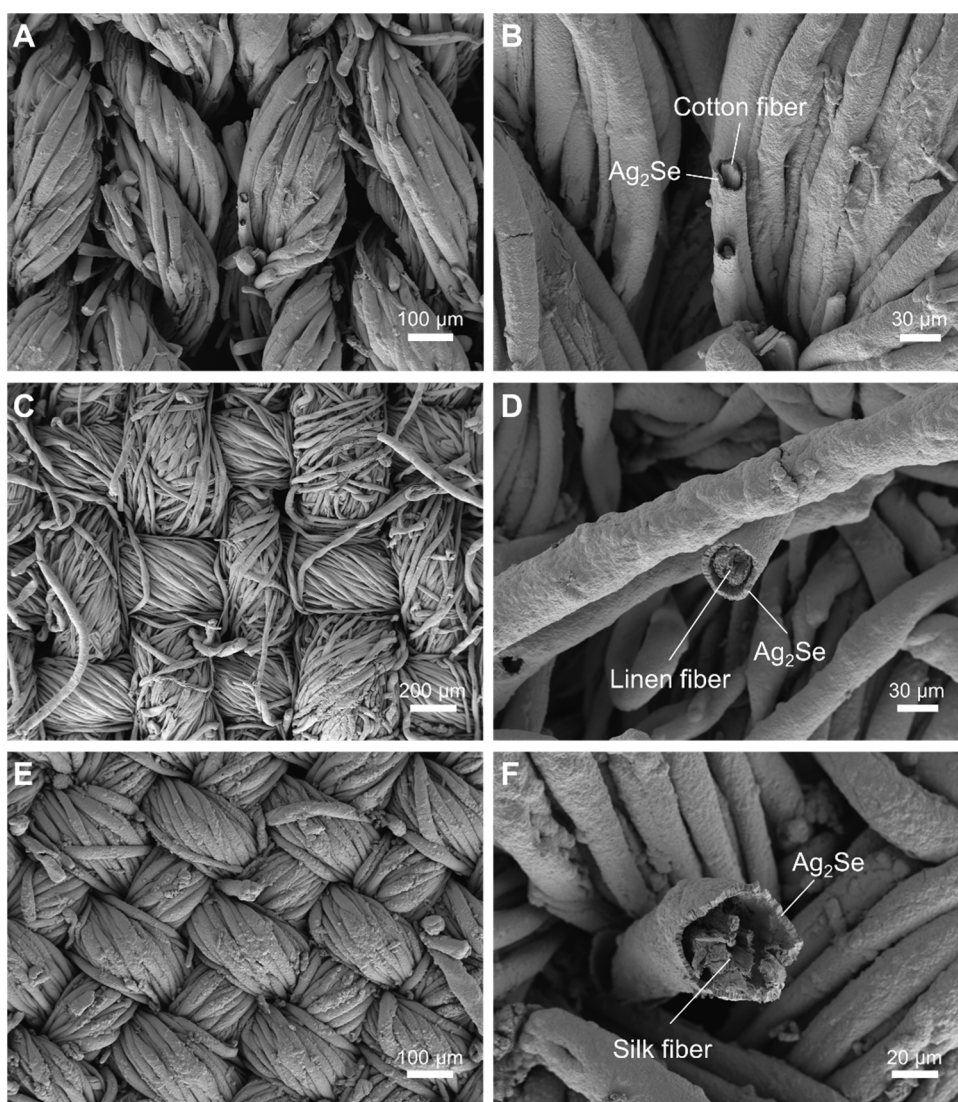

**Fig. S18.** The micrographs of various thermoelectric fabrics. **A** and **B**, Cotton fabrics. **C** and **D**, Linen fabrics. **E** and **F**, Silk fabrics.

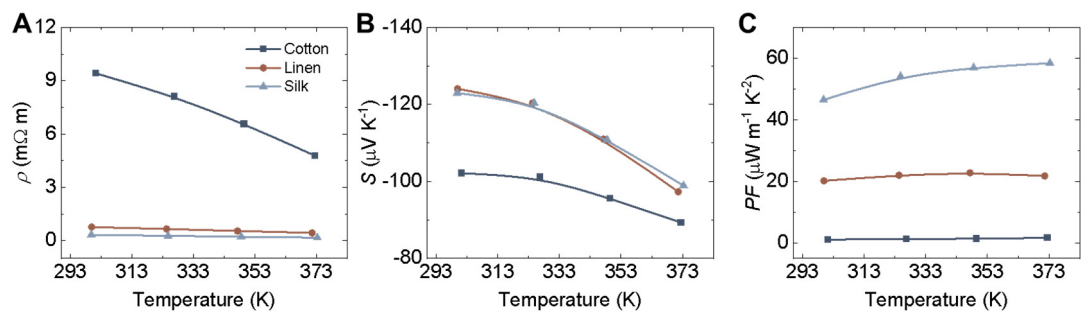

**Fig. S19.** Electrical resistivity (A), Seebeck coefficient (B) and power factor (C) of the thermoelectric textile.

**Table S1.** The element ratio in prepared Ag<sub>2</sub>Se network.

| Element | Wt%    | Atomic% |
|---------|--------|---------|
| Se      | 26.07  | 32.51   |
| Ag      | 73.93  | 67.49   |
| Total:  | 100.00 | 100.00  |

**Table S2.** The simulation conditions and parameters.

| Parameters                                           | Values                                 | Source              |
|------------------------------------------------------|----------------------------------------|---------------------|
| Thermal conductivity of Ag <sub>2</sub> Se network   | 0.04 W m <sup>-1</sup> K <sup>-1</sup> | Measurement         |
| Thermal conductivity of TE bulk (commercial)         | 1.6 W m <sup>-1</sup> K <sup>-1</sup>  | Ref. <sup>1</sup>   |
| Thermal conductivity of copper                       | 400 W m <sup>-1</sup> K <sup>-1</sup>  | COMSOL              |
| Thermal conductivity of filler (PDMS)                | 0.15 W m <sup>-1</sup> K <sup>-1</sup> | Ref. <sup>2,3</sup> |
| Resistivity of Ag <sub>2</sub> Se network            | 1.16 × 10 <sup>-3</sup> Ω m            | Measurement         |
| Resistivity of TE bulk (commercial)                  | 9.9 × 10 <sup>-6</sup> Ω m             | Ref. <sup>1</sup>   |
| Resistivity of copper                                | 1.7 × 10 <sup>-8</sup> Ω m             | COMSOL              |
| Seebeck coefficient of Ag <sub>2</sub> Se network    | -130 μV K <sup>-1</sup>                | Measurement         |
| Seebeck coefficient of TE bulk (commercial)          | -197 μV K <sup>-1</sup>                | Ref. <sup>1</sup>   |
| Heat transfer coefficient of skin surface            | 39.2 W m <sup>-2</sup> K <sup>-1</sup> | Ref. <sup>3,4</sup> |
| Heat transfer coefficient of air                     | 10.5 W m <sup>-2</sup> K <sup>-1</sup> | Ref. <sup>4</sup>   |
| Skin surface temperature                             | 306 K                                  | Ref. <sup>3,4</sup> |
| Module height (full filled / 10% filled / networked) | 3 mm                                   | –                   |
| Fill factor (full filled / 10% filled / networked)   | 100% / 10% / 100%                      | –                   |

## References

- 1 Liu, Y. *et al.* Passive Radiative Cooling Enables Improved Performance in Wearable Thermoelectric Generators. *Small* **18**, e2106875 (2022).
- 2 Suarez, F. *et al.* Flexible Thermoelectric Generator Using Bulk Legs and Liquid Metal Interconnects for Wearable Electronics. *Appl. Energy* **202**, 736-745 (2017).
- 3 Ozturk *et al.* Designing Thermoelectric Generators for Self-Powered Wearable Electronics. *Energy Environ. Sci.* (2016).
- 4 Kim, C. S. *et al.* Structural Design of a Flexible Thermoelectric Power Generator for Wearable Applications. *Appl. Energy* **214**, 131-138 (2018).
